# Supplementary material
Source: PubMed Central journal article supplement (PMC6684852)
Supplement: NIHMS1531937-supplement-1.pdf [file NIHMS1531937-supplement-1.pdf]

Supplemental Table 1

|          |                           | Comparison     | Significance   | Adjusted P Value |          |                | Comparison              | Significance | Adjusted P Value |      |          |
|----------|---------------------------|----------------|----------------|------------------|----------|----------------|-------------------------|--------------|------------------|------|----------|
| <b>A</b> | <b>10 dpi spleen OT-I</b> | Total          | N4 vs. Y3      | ****             | < 0.0001 | <b>B</b>       | <b>10 dpi lung OT-I</b> | Total        | N4 vs. Y3        | ***  | 0.0007   |
|          |                           |                | N4 vs. T4      | ****             | < 0.0001 |                |                         |              | N4 vs. T4        | **** | < 0.0001 |
|          |                           |                | N4 vs. N4 1000 | ns               | 0.1714   |                |                         |              | N4 vs. N4 1000   | **** | < 0.0001 |
|          |                           |                | Y3 vs. T4      | ns               | 0.9088   |                |                         |              | Y3 vs. T4        | ns   | 0.1619   |
|          |                           |                | Y3 vs. N4 1000 | *                | 0.0123   |                |                         |              | Y3 vs. N4 1000   | ns   | 0.8948   |
|          |                           |                | T4 vs. N4 1000 | ***              | 0.0003   |                |                         |              | T4 vs. N4 1000   | ns   | 0.5397   |
|          | iv+                       | N4 vs. Y3      | ****           | < 0.0001         | iv+      | N4 vs. Y3      | ****                    | < 0.0001     |                  |      |          |
|          |                           | N4 vs. T4      | ****           | < 0.0001         |          | N4 vs. T4      | ****                    | < 0.0001     |                  |      |          |
|          |                           | N4 vs. N4 1000 | ns             | 0.2434           |          | N4 vs. N4 1000 | ns                      | 0.1837       |                  |      |          |
|          |                           | Y3 vs. T4      | ns             | 0.9476           |          | Y3 vs. T4      | ns                      | 0.8098       |                  |      |          |
|          |                           | Y3 vs. N4 1000 | *              | 0.0484           |          | Y3 vs. N4 1000 | ns                      | 0.0928       |                  |      |          |
|          |                           | T4 vs. N4 1000 | **             | 0.0031           |          | T4 vs. N4 1000 | **                      | 0.0029       |                  |      |          |
|          | iv-                       | N4 vs. Y3      | ****           | < 0.0001         | iv-      | N4 vs. Y3      | ***                     | 0.001        |                  |      |          |
|          |                           | N4 vs. T4      | ****           | < 0.0001         |          | N4 vs. T4      | ****                    | < 0.0001     |                  |      |          |
|          |                           | N4 vs. N4 1000 | *              | 0.0391           |          | N4 vs. N4 1000 | ****                    | < 0.0001     |                  |      |          |
|          |                           | Y3 vs. T4      | ns             | 0.9343           |          | Y3 vs. T4      | ns                      | 0.1376       |                  |      |          |
|          |                           | Y3 vs. N4 1000 | *              | 0.0294           |          | Y3 vs. N4 1000 | ns                      | 0.7232       |                  |      |          |
|          |                           | T4 vs. N4 1000 | ***            | 0.0006           |          | T4 vs. N4 1000 | ns                      | 0.7391       |                  |      |          |
| <b>C</b> | <b>34 dpi spleen OT-I</b> | Total          | N4 vs. Y3      | *                | 0.0406   | <b>D</b>       | <b>34 dpi lung OT-I</b> | Total        | N4 vs. Y3        | ns   | 0.8253   |
|          |                           |                | N4 vs. T4      | ***              | 0.0002   |                |                         |              | N4 vs. T4        | **** | < 0.0001 |
|          |                           |                | N4 vs. N4 1000 | *                | 0.046    |                |                         |              | N4 vs. N4 1000   | *    | 0.0214   |
|          |                           |                | Y3 vs. T4      | ns               | 0.9168   |                |                         |              | Y3 vs. T4        | *    | 0.0173   |
|          |                           |                | Y3 vs. N4 1000 | ns               | > 0.9999 |                |                         |              | Y3 vs. N4 1000   | ns   | 0.28     |
|          |                           |                | T4 vs. N4 1000 | ns               | 0.9453   |                |                         |              | T4 vs. N4 1000   | ns   | 0.861    |
|          | iv+                       | N4 vs. Y3      | ns             | 0.2058           | iv+      | N4 vs. Y3      | ns                      | 0.1399       |                  |      |          |
|          |                           | N4 vs. T4      | **             | 0.0034           |          | N4 vs. T4      | ****                    | < 0.0001     |                  |      |          |
|          |                           | N4 vs. N4 1000 | ns             | 0.177            |          | N4 vs. N4 1000 | **                      | 0.0045       |                  |      |          |
|          |                           | Y3 vs. T4      | ns             | 0.8822           |          | Y3 vs. T4      | *                       | 0.0482       |                  |      |          |
|          |                           | Y3 vs. N4 1000 | ns             | 0.999            |          | Y3 vs. N4 1000 | ns                      | 0.6265       |                  |      |          |
|          |                           | T4 vs. N4 1000 | ns             | 0.9482           |          | T4 vs. N4 1000 | ns                      | 0.6788       |                  |      |          |
|          | iv-                       | N4 vs. Y3      | *              | 0.0103           | iv-      | N4 vs. Y3      | ns                      | 0.9171       |                  |      |          |
|          |                           | N4 vs. T4      | ****           | < 0.0001         |          | N4 vs. T4      | ****                    | < 0.0001     |                  |      |          |
|          |                           | N4 vs. N4 1000 | *              | 0.0153           |          | N4 vs. N4 1000 | *                       | 0.0423       |                  |      |          |
|          |                           | Y3 vs. T4      | ns             | 0.9501           |          | Y3 vs. T4      | *                       | 0.0293       |                  |      |          |
|          |                           | Y3 vs. N4 1000 | ns             | > 0.9999         |          | Y3 vs. N4 1000 | ns                      | 0.3029       |                  |      |          |
|          |                           | T4 vs. N4 1000 | ns             | 0.9545           |          | T4 vs. N4 1000 | ns                      | 0.9142       |                  |      |          |

S. Table 1: One-way ANOVA statistical analysis of data sets from Fig. 1 A-D.

## Supplemental Figure 1

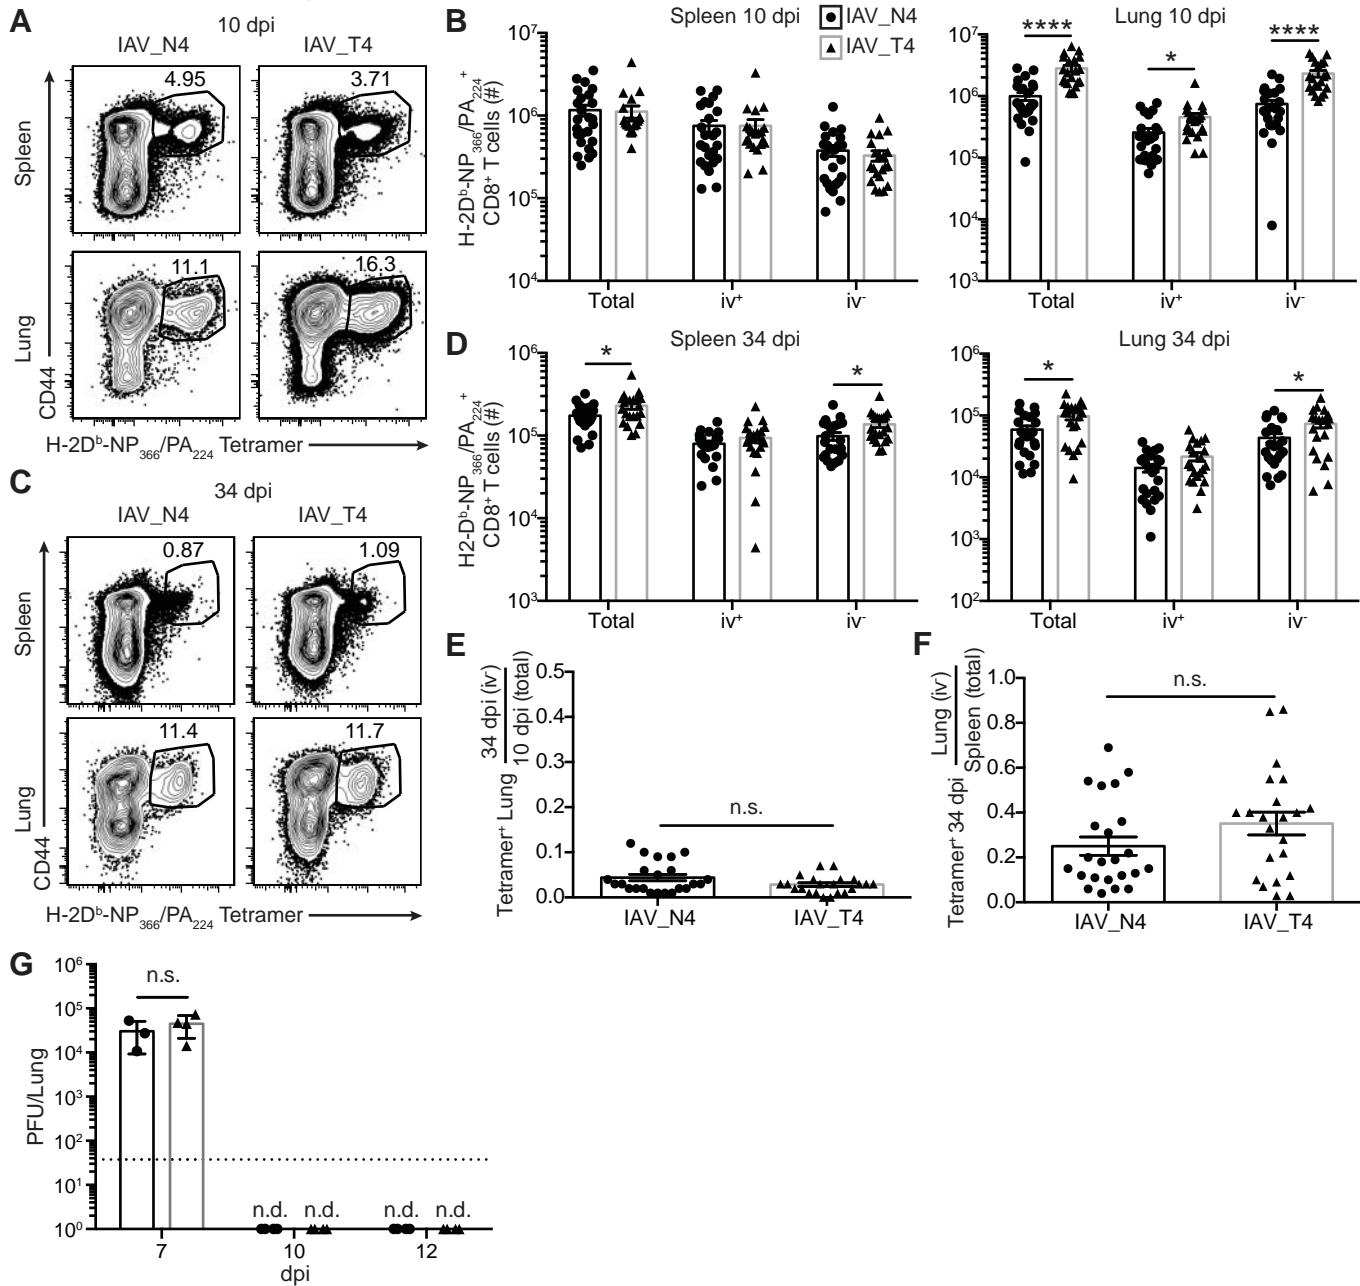

**S. Figure 1 Endogenous virus-specific CD8<sup>+</sup> T cells are equivalently stimulated by influenza A viruses expressing high and low affinity OT-I epitopes. (A-F)** CD45.1<sup>+</sup> OT-I T cells were transferred into CD45.2<sup>+</sup> hosts and were infected with 40 PFUs of IAV\_N4 or IAV\_T4. On indicated dpi, spleen and lungs were harvested after anti-CD8 $\alpha$  iv injections. **(A and C)** Representative flow plots of total host CD8<sup>+</sup> T cells for H-2D<sup>b</sup>-PA<sub>224</sub>/NP<sub>366</sub> tetramers and CD44, on 10 **(A)** or 34 **(C)** dpi. Numbers represent the percentage of cells in the gate. **(B and D)** The number of endogenous CD8<sup>+</sup> H-2D<sup>b</sup>-PA<sub>224</sub>/NP<sub>366</sub> tetramer<sup>+</sup> CD44<sup>hi</sup> cells, either total (iv<sup>+</sup> and iv<sup>-</sup> combined), iv<sup>+</sup>, or iv<sup>-</sup> cells at 10 **(B)** or 34 **(D)** dpi. **(E)** The number of iv<sup>-</sup> tetramer<sup>+</sup> CD8<sup>+</sup> T cells in the lung at 34 dpi was divided by the average number of total tetramer<sup>+</sup> CD8<sup>+</sup> T cells in the lung at 10 dpi. **(F)** The number of iv<sup>-</sup> tetramer<sup>+</sup> CD8<sup>+</sup> T cells in the lung at 34 dpi was divided by the average number of total tetramer<sup>+</sup> CD8<sup>+</sup> T cells in the spleen at 34 dpi. **(G)** CD45.2<sup>+</sup> mice were infected with 40 PFUs of IAV\_N4 or IAV\_T4. Lungs were harvested at indicated dpi and virus titered by plaque assay. Dotted line represents the limit of detection. The results **(B and D)** are compiled from at least 5 independent experiments with at least 4 mice per group, per experiment ( $\pm$  SEM). The results **(G)** are from 1 experiment with 3 mice per group ( $\pm$  SEM). \* $p < 0.05$ , \*\* $p < 0.01$ , \*\*\* $p < 0.001$ , \*\*\*\* $p < 0.0001$  (unpaired t test).

## Supplemental Figure 2

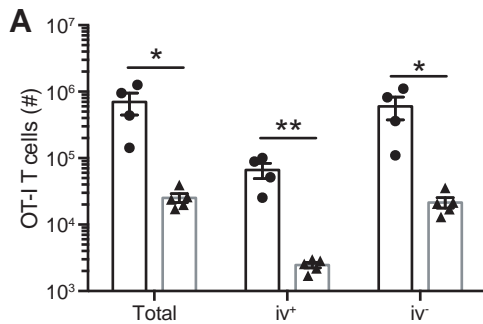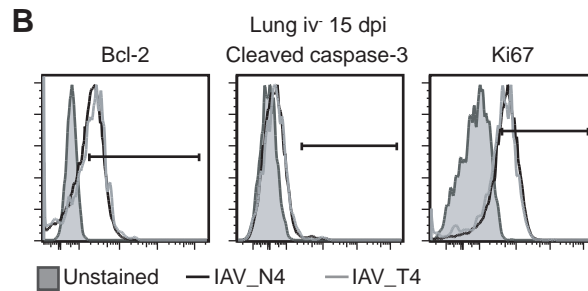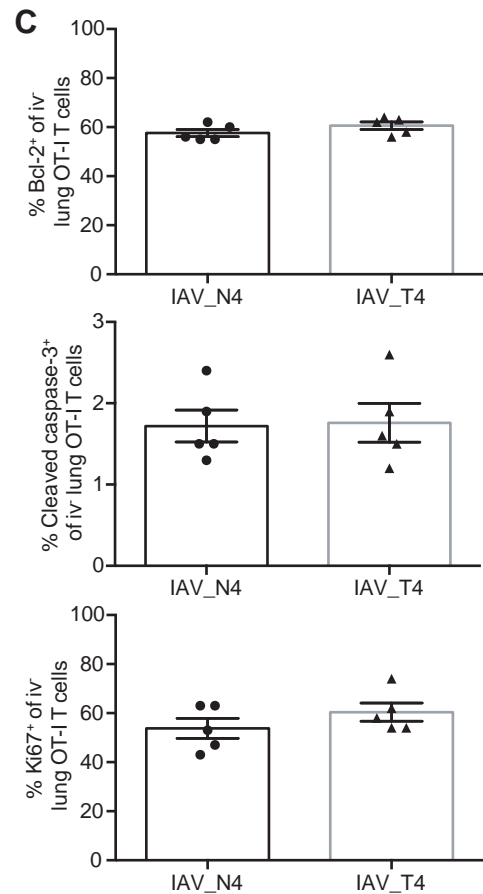

**S. Figure 2 TCR signal strength does not alter the phenotype of cells during contraction.** Challenged mice were generated as in Figure 1. **(A)** The number total,  $iv^-$  or  $iv^+$  lung OT-I T cells at 15 dpi. **(B)** Representative Bcl-2, cleaved caspase-3 and Ki67 staining of IAV\_N4 or IAV\_T4 challenged  $iv^-$  lung OT-I T cells at 15 dpi. **(C)** The percentage of  $iv^-$  lung OT-I T cells that Bcl-2<sup>+</sup>, cleaved caspase-3<sup>+</sup> or Ki67<sup>+</sup> at 15 dpi. The results **(A, C)** are of 1 experiment with 5 mice per group ( $\pm$  SEM). \* $p < 0.05$ , \*\* $p < 0.01$  (unpaired t test).

### Supplemental Figure 3

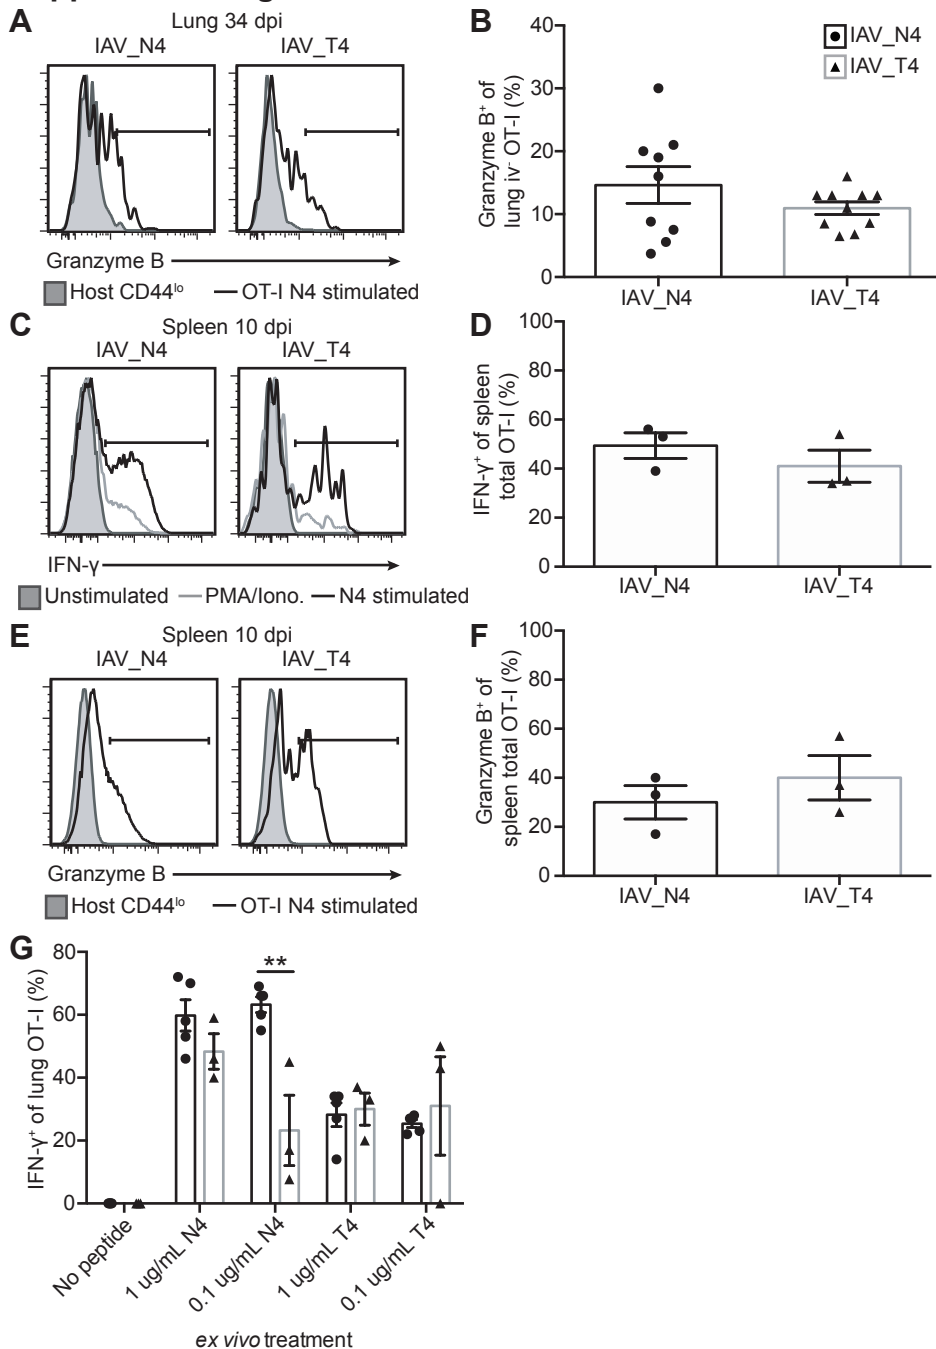

**S. Figure 3 TCR affinity does not impact the production of effector molecules.** Challenged mice were generated as in Figure 1. On indicated dpi, lungs and spleens were harvested and cells were stimulated *ex vivo* with 1  $\mu$ g/mL N4 peptide. **(A,E)** Representative granzyme B staining of *iv* lung **(A)** or total spleen **(E)** OT-I T cells and CD44<sup>lo</sup> host cells stimulated with N4 peptide. **(C)** Representative IFN- $\gamma$ <sup>+</sup> staining of total spleen OT-I T cells unstimulated, stimulated with PMA/Ionomycin or N4 peptide. **(B)** Percentage of *iv* lung granzyme B<sup>+</sup> OT-I T cells after *ex vivo* N4 stimulation at 34 dpi. **(D, F)** Percentage of total spleen IFN- $\gamma$ <sup>+</sup> **(D)** or granzyme B<sup>+</sup> **(F)** OT-I T cells after *ex vivo* N4 stimulation at 10 dpi. **(G)** Percentage of lung IFN- $\gamma$ <sup>+</sup> OT-I T cells after *ex vivo* stimulation with 1 or 0.1  $\mu$ g/mL of N4 or T4 peptides at 34 dpi. The results **(B)** are compiled from 2 independent experiments with at least 4 mice per group, per experiment ( $\pm$  SEM). The results **(D, F, G)** are from 1 experiment with at least 3 mice per group ( $\pm$  SEM). \* $p$  < 0.05 (unpaired t test).
